# Supplementary material for: Mass Spectrometry Analysis Coupled with de novo Sequencing Reveals Amino Acid Substitutions in Nucleocapsid Protein from Influenza A Virus
Source: MDPI journal article supplement (doi:10.3390/ijms15022465), 2014-02-11
Supplement: s1 [file s1]

(((((A/Scotland/EastKilbride_417647/2009_H1N1:0.0111227000,A/Singapore/66L/2007_H1N1:0.0048773200):0.0325419000,((((((((((A/South_Australia/45/2000_H1N1:0.0029726000,A/South_Australia/63/2000_H1N1:0.0000273973):0.0003204490,A/South_Australia/25/2000_H1N1:0.0016795500):0.0005424470,A/New_York/146/2000_H1N1:0.0014575500):0.0003315630,A/South_Australia/29/2000_H1N1:0.0016684400):0.0052952700,((A/Moscow/13/1998_H1N1:0.0038438300,A/Malaysia/12530/1997_H1N1:0.0001561710):0.0019086800,A/New_York/615/1995_H1N1:0.0000913212):0.0017047300):0.0026317500,(A/Taiwan/117/1996_H1N1:0.0112281000,(A/Taiwan/0130/1996_H1N1:0.0105181000,((A/Shanghai/8/1996_H1N1:0.0031838600,(A/Texas/36/1991_H1N1:0.0019055600,(A/Texas/36/1991_H1N1:0.0019967400,A/New_York/694/1995_H1N1:0.0000032595):0.0000944444):0.0008161420):0.0009818890,A/Texas/36/1991_H1N1:0.0005181110):0.0007319380):0.0007719320):0.0013604400):0.0010303700,(A/Florida/2/1993_H1N1:0.0016861000,A/New_York/656/1995_H1N1:0.0003138980):0.0027235400):0.0045860700,((A/Hong_Kong/427/1998_H1N1:0.0126614000,(((((((((((A/swine/Fujian/0325/2008_H1N1:0.0307768000,A/Western_Australia/20/2001_H1N1:0.0032232000):0.0027054000,(A/Malaysia/1811552/2007_H1N1:0.0016573700,A/Ostrava/801/1998_H1N1:0.0003426290):0.0012946000):0.0002754080,((((A/Taiwan/123/2002_H1N1:0.0020000000,A/Chile/8885/2001_H1N1:0.0000000000):0.0029467700,A/Illinois/UR06-0032/2007_H1N1:0.0030532300):0.0009796810,(A/West_Coast/33/2001_H1N1:0.0010095500,A/Malaysia/30025/2004_H1N1:0.0009904500):0.0005203190):0.0001697040,(A/Taiwan/4845/1999_H1N1:0.0038641100,(A/New_York/281/2001_H1N1:0.0028449000,((((((A/St._Petersburg/8/2006_H1N1:0.0039430200,A/New_Caledonia/20-JY2/1999_H1N1:0.0000569782):0.0014800900,A/Malaysia/33132/2005_H1N1:0.0015199100):0.0004671730,(A/Singapore/22A/2007_H1N1:0.0039976500,(A/New_York/227/2003_H1N1:0.0019953000,(A/New_York/228/2003_H1N1:0.0019959800,A/New_Caledonia/20/1999_H1N1:0.0000040215):0.0000046980):0.0000023522):0.0000328272):0.0000363915,A/Singapore/20J/2007_H1N1:0.0009636090):0.0001585340,A/England/493/2006_H1N1:0.0018414700):0.0002971070,A/New_York/291/2002_H1N1:0.0017028900):0.0001551000):0.0001358940):0.0003302960):0.0002245920):0.0003558210,(A/Western_Australia/18/2001_H1N1:0.0014741800,A/Vermont/UR06-0035/2007_H1N1:0.0005258150):0.0013941800):0.0005527360,((A/Brisbane/97/2007_H1N1:0.0040209400,A/Singapore/103/2005_H1N1:0.0019790600):0.0029372100,((A/Taiwan/2832/2008_H1N1:0.0015193600,A/LongAn/HCM504/2006_H1N1:0.0004806410):0.0016845700,(A/HaNoi/Q580/2006_H1N1:0.0019733100,(A/Malaysia/32151/2005_H1N1:0.0019896000,(A/Thailand/CU88/2006_H1N1:0.0020000000,A/Malaysia/32110/2005_H1N1:0.0000000000):0.0000104020):0.0000266943):0.0003154290):0.0005627870):0.0000097638):0.0003379970,((((((A/Bangkok/163/2000_H1N1:0.0019100100,(A/New_York/302/2001_H1N1:0.0029898700,A/New_York/233/2000_H1N1:0.0000101266):0.0000899873):0.0013262000,A/Malaysia/14075/1997_H1N1:0.0006738000):0.0004069460,A/Memphis/6/2003_H1N1:0.0015930500):0.0009539920,A/Malaysia/14458/1997_H1N1:0.0010460100):0.0007580160,(A/Taiwan/2885/2008_H1N1:0.0011917400,A/Ohio/UR06-0353/2007_H1N1:0.0008082560):0.0012419800):0.0009292780,((A/Memphis/6/2001_H1N1:0.0020115800,A/New_South_Wales/26/2000_H1N1:0.0019884200):0.0003002620,A/Auckland/580/2000_H1N1:0.0016997400):0.0008207220):0.0006612710):0.0003675070,A/New_York/220/2002_H1N1:0.0015234800):0.0006641800,A/New_York/497/2003_H1N1:0.0034608200):0.0001679410,(A/Malaysia/1706215/2007_H1N1:0.0021910900,(A/Singapore/30/2006_H1N1:0.0007011000,A/Singapore/36/2006_H1N1:0):0.0000219109):0.0026758100):0.0007074760,(((A/Canterbury/51/2000_H1N1:0.0019946100,(A/Canterbury/87/2000_H1N1:0.0019903400,(A/Auckland/597/2000_H1N1:0.0020000000,A/Wellington/2/2000_H1N1:0.0000000000):0.0000096582):0.0000053943):0.0005723670,A/Wellington/5/2000_H1N1:0.0014276300):0.0006340320,A/Canterbury/95/2000_H1N1:0.0013659700):0.0018386700):0.0003914380,(((A/TW/3355/1997_H1N1:0.0136720000,(A/Malaysia/14817/1997_H1N1:0.0019581400,(A/Johannesburg/159/1997_H1N1:0.0019864000,A/Malaysia/11641/1997_H1N1:0.0000135952):0.0000418568):0.0003279930):0.0004970810,((A/quail/Nanchang/12-340/2000_H1N1:0.0046452800,A/Shanghai/2/1997_H1N1:0.0013547200):0.0008645420,A/Nanchang/13/1996_H1N1:0.0011354600):0.0005029190):0.0008415680,A/Hong_Kong/470/1997_H1N1:0.0031584300):0.0015257300):0.0013841200):0.0021416300,(((((((((((((A/Managua/5751.01/2008_H1N1:0.0019954800,A/Managua/2860.01/2008_H1N1:0.0000045161):0.0014220200,(A/North_Carolina/UR06-0099/2007_H1N1:0.0015823500,(A/Virginia/UR06-0295/2007_H1N1:0.0019557300,A/North_Carolina/UR06-0011/2006_H1N1:0.0000442708):0.0004176550):0.0005779790):0.0014486300,(A/Ohio/UR06-0522/2007_H1N1:0.0029311400,A/Tennessee/UR06-0055/2007_H1N1:0.0010688600):0.0005513740):0.0002942660,((A/Tennessee/UR06-0151/2007_H1N1:0.0029095000,A/Florida/UR06-0208/2007_H1N1:0.0010905000):0.0009117420,(A/Peru/WRAIR1376P/2007_H1N1:0.0011898400,A/Kentucky/UR06-0034/2007_H1N1:0.0008101600):0.0010882600):0.0007057340):0.0000991198,((A/Texas/UR06-0306/2007_H1N1:0.0012453600,A/California/UR06-0564/2007_H1N1:0.0007546420):0.0019362500,((((((A/England/494/2006_H1N1:0.0029743700,(((A/New_York/8/2006_H1N1:0.0019570900,A/Vermont/UR06-0051/2007_H1N1:0.0000429129):0.0019850700,(A/Kentucky/UR06-0072/2007_H1N1:0.0019918000,(A/Mississippi/UR06-0145/2007_H1N1:0.0019893800,(A/Otago/5/2005_H1N1:0.0019960500,(A/Tennessee/UR06-0414/2007_H1N1:0.0019978200,(A/Virginia/UR06-0384/2007_H1N1:0.0019956400,(A/Colorado/UR06-0498/2007_H1N1:0.0019970200,(A/Texas/UR06-0204/2007_H1N1:0.0019969100,(A/Colorado/UR06-0110/2007_H1N1:0.0019966700,(A/Texas/UR06-0502/2007_H1N1:0.0019990400,(A/Mississippi/UR06-0048/2007_H1N1:0.0019990700,(A/Ohio/UR06-0166/2007_H1N1:0.0019985800,(A/Virginia/UR06-0361/2007_H1N1:0.0019985800,A/Auckland/619/2005_H1N1:0.0000014164):0.0000014184):0.0000009322):0.0000009557):0.0000033276):0.0000030941):0.0000029764):0.0000043627):0.0000021845):0.0000039520):0.0000106162):0.0000081976):0.0000149329):0.0000172259,A/New_York/UR06-0134/2007_H1N1:0.0019827700):0.0000256298):0.0000172563,A/Texas/UR06-0271/2007_H1N1:0.0019827400):0.0001105980,A/Ohio/UR06-0091/2007_H1N1:0.0018894000):0.0001387540,A/Kansas/UR06-0143/2007_H1N1:0.0018612500):0.0002334340,A/Oregon/UR06-0291/2007_H1N1:0.0017665700):0.0001209150,A/Colorado/UR06-0207/2007_H1N1:0.0018790800):0.0000637540):0.0001503920):0.0003790890,A/Wellington/75/2006_H1N1:0.0026211500):0.0002940170,(A/Ohio/UR06-0177/2007_H1N1:0.0029860100,A/Kentucky/UR06-0042/2007_H1N1:0.0000139860):0.0017059800):0.0002787770,A/Oregon/UR06-0609/2007_H1N1:0.0016587200):0.0008039470,A/California/UR06-0393/2007_H1N1:0.0012273000):0.0004121340,A/Texas/UR06-0397/2007_H1N1:0.0015878700):0.0013234700,((((((((((((((((((((A/Peru/WRAIR1298P/2007_H1N1:0.0016613600,A/Japan/AF07/2008_H1N1:0.0003386360):0.0008279590,A/Managua/1038.01/2008_H1N1:0.0011720400):0.0007572670,((A/California/VRDL167/2009_H1N1:0.0020000000,A/Peru/WRAIR1299P/2007_H1N1:0.0000000000):0.0000013141,A/Peru/WRAIR1295P/2007_H1N1:0.0009986860):0.0012427300):0.0004549340,(((((((A/Managua/3307.01/2008_H1N1:0.0019831800,(A/Florida/UR07-0026/2008_H1N1:0.0020000000,A/Managua/107.01/2008_H1N1:0.0000200000):0.0000168176):0.0019749700,((((((((((A/Mexico/UASLP-008/2008_H1N1:0.0049967000,A/Mexico/UASLP-009/2008_H1N1:0.0030033000):0.0009994840,(((A/South_Carolina/WRAIR1116P/2009_H1N1:0.0040013700,(A/Thailand/CU-H17/2009_H1N1:0.0019974200,A/Thailand/CU-B97/2009_H1N1:0.0000025773):0.0019986300):0.0000006859,A/New_York/3442/2009_H1N1:0.0019993100):0.0000003434,A/California/VRDL141/2009_H1N1:0.0019996600):0.0000005158):0.0000012913,A/California/VRDL153/2009_H1N1:0.0019987100):0.0000006466,A/Mexico/UASLP-006/2008_H1N1:0.0019993500):0.0000030862,A/Louisiana/WRAIR1170P/2009_H1N1:0.0019969100):0.0000015452,A/California/VRDL194/2009_H1N1:0.0019984500):0.0000021587,A/Boston/68/2009_H1N1:0.0019978400):0.0000038548,A/Taiwan/3293/2008_H1N1:0.0019961500):0.0000067912,(A/Nagasaki/07N020/2008__H1N1:0.0010079400,A/Washington/AF06/2007_H1N1:0.0009920630):0.0009932090):0.0000040957,A/Hue/H442/2008_H1N1:0.0019959000):0.0000250312):0.0000188092,A/Taiwan/11526/2008_H1N1:0.0019811900):0.0000129094,A/Sullana/WRAIR1707P/2009_H1N1:0.0019870900):0.0001511540,(A/California/VRDL135/2009_H1N1:0,A/Nyiregyhaza/01/2007_H1N1:0,A/Tianjin/15/2009_H1N1:0):0):0.0000835363,A/Managua/3153.01/2008_H1N1:0.0019164600):0.0000433868,A/Boston/94/2009_H1N1:0.0019566100):0.0000450657):0.0000934788,A/New_York/08-1326/2008_H1N1:0.0019065200):0.0001520240,(A/New_York/1692/2009_H1N1:0.0012401400,A/Malaysia/2143035/2009_H1N1:0.0007598640):0.0008479760):0.0000859154,A/Kuwait/WRAIR1119P/2009_H1N1:0.0019140800):0.0000609176,A/Texas/WRAIR1115P/2009_H1N1:0.0019390800):0.0000390426,A/New_York/08-1253/2008_H1N1:0.0019609600):0.0001397310,A/Sydney/142/2007_H1N1:0.0018602700):0.0000733541,A/Managua/156.01/2008_H1N1:0.0019266500):0.0003080370,A/Boston/6/2009_H1N1:0.0016919600):0.0001743310,A/Yokohama/78/2008_H1N1:0.0018256700):0.0001298370,A/Peru/WRAIR1377P/2007_H1N1:0.0018701600):0.0000876486,A/Peru/WRAIR1509P/2007_H1N1:0.0019123500):0.0006256430,A/Thailand/CU-H565/2009_H1N1:0.0013743600):0.0004274070,A/Managua/3759.02/2008_H1N1:0.0015725900):0.0003955570,A/Managua/5214.01/2008_H1N1:0.0016044400):0.0002117140,A/Boston/49/2008_H1N1:0.0037882900):0.0006122410,(A/Nevada/WRAIR1257P/2009_H1N1:0.0016318500,A/Medellin/WRAIR1297P/2008_H1N1:0.0003681470):0.0033875600):0.0006524440):0.0001976660,(A/Boston/88/2009_H1N1:0.0035786500,A/Shanghai/LWS1/2009_H1N1:0.0004213490):0.0013027100):0.0015417100,(A/Piura/WRAIR1699P/2008_H1N1:0.0065317600,A/Texas/WRAIR1118P/2009_H1N1:0.0034682400):0.0013326700):0.0012466600):0.0027470000):0.0042245200,((((((A/swine/Tianjin/01/2004_H1N1:0.0030038400,A/swine/Henan/01/2006_H1N1:0.0019961600):0.0028858500,A/Siena/10/1989_H1N1:0.0031141500):0.0008862280,((A/Taiwan/1/1986_H1N1:0.0059137000,(A/Memphis/12/1986_H1N1:0.0019861100,(A/Memphis/4/1987_H1N1:0.0019952500,A/Taiwan/01/1986_H1N1:0.0000047544):0.0000138889):0.0000862977):0.0007081680,A/Siena/4/1987_H1N1:0.0012918300):0.0011137700):0.0029720300,(((((((((A/Ohio/101/1983_H1N1:0.0025156400,A/Ohio/101/1983_H1N1:0.0014843600):0.0026962700,A/Memphis/53/1983_H1N1:0.0013037300):0.0007351530,A/Memphis/54/1983_H1N1:0.0032648500):0.0003609780,(A/Memphis/28/1983_H1N1:0.0019853500,A/Ohio/4/1983_H1N1:0.0000146497):0.0006390220):0.0006583920,(A/India/6263/1980_H1N1:0.0020413500,A/Memphis/51/1983_H1N1:0.0019586500):0.0013416100):0.0003193130,A/Chile/1/1983_H1N1:0.0026806900):0.0011827700,A/Memphis/7/1980_H1N1:0.0008172310):0.0005149240,(A/New_Zealand/7/1983_H1N1:0.0018453900,A/Christs_Hospital/157/1982_H1N1:0.0001546050):0.0017350800):0.0017770100,((A/Memphis/6/1983_H1N1:0.0017917300,(A/Memphis/1/1983_H1N1:0.0009602270,A/Baylor/11735/1982_H1N1:0.0000397727):0.0002082650):0.0007865820,A/Maryland/2/1980_H1N1:0.0002134180):0.0010823700):0.0016568800):0.0005617560,(A/Ohio/101/1983_H1N1:0.0018306700,A/Ohio/101/1983_H1N1:0.0001693330):0.0052761300):0.0014537400,A/Siena/9/1989_H1N1:0.0050501700):0.0052484500):0.0103035000,(((A/Mayo/unknown_H1N1:0.0097535000,((A/New_Jersey/4/1976_H1N1:0.0104674000,((A/California/10/1978_H1N1:0.0019962700,(A/USSR/46/1979_H1N1:0.0019962800,A/California/10/1978_H1N1:0.0000037221):0.0000037267):0.0005286070,A/California/45/1978_H1N1:0.0014713900):0.0025325800):0.0016861600,A/Kiev/59/1979_H1N1:0.0038138400):0.0017465000):0.0114304000,((((((((A/Memphis/10/1978_H1N1:0.0020000000,A/USSR/90/1977_H1N1:0.0000000000):0.0010128500,A/USSR/92/1977_H1N1:0.0009871470):0.0009795220,(A/Hong_Kong/117/1977_H1N1:0.0049793200,(A/Arizona/14/1978_H1N1:0.0019978400,A/Memphis/13/1978_H1N1:0.0000021623):0.0000206835):0.0000204780):0.0012668600,(A/Brazil/11/1978_H1N1:0.0030145300,A/Tientsin/78/1977_H1N1:0.0009854650):0.0004831400):0.0034375200,A/Fort_Warren/1/1950_H1N1:0.0021874800):0.0032182200,A/Albany/4836/1950_H1N1:0.0007817830):0.0027590300,((((((A/Roma/1949_H1N1:0.0035222800,A/FLW/1951_H1N1:0.0024777200):0.0007920050,A/Albany/14/1951_H1N1:0.0012079900):0.0012882200,A/Netherlands/001H1/1954_H1N1:0.0007117850):0.0009787350,(((A/Albany/12/1951_H1N1:0.0019641000,A/Malaysia/1954_H1N1:0.0000358957):0.0018676100,A/Fort_Warren/1/1950_H1N1:0.0001323850):0.0012804500,((A/Albany/4835/1948_H1N1:0.0020547800,A/Albany/13/1951_H1N1:0.0019452200):0.0004972490,A/Liverpool/1951_H1N1:0.0005027510):0.0007195530):0.0003962650):0.0005072890,A/Netherlands/001R1/1953_H1N1:0.0023052100):0.0007674960,A/Albany/1618/1951_H1N1:0.0019825000):0.0010222200):0.0013013000,((A/Loyang/4/1957_H1N1:0.0039471400,A/Kw/1/1957_H1N1:0.0000528600):0.0019823500,((A/Denver/1957_H1N1:0.0039969900,A/Denver/JY2/1957_H1N1:0.0010030100):0.0009742970,A/Netherlands/001B1/1956_H1N1:0.0000257032):0.0000176508):0.0015639300):0.0042815400):0.0036548200,((((A/Fort_Monmouth/1/1947_H1N1:0.0069810800,A/Fort_Monmouth/1/1947_H1N1:0.0000189155):0.0024377900,(A/Fort_Monmouth/1-JY2/1947_H1N1:0.0009670730,A/Netherlands/002K1/1949_H1N1:0):0.0000243779):0.0014193300,(A/Monmouth/1947_H1N1:0.0020089700,A/Fort_Monmouth/1/1947_H1N1:0.0000200897):0.0000806697):0.0042076000,(A/Cameron/1946_H1N1:0.0029827200,A/Hickox/1940_H1N1:0.0000172786):0.0057924000):0.0089716400):0.0007880950):0.0089601000):0.0080915500,(((((((((A/Mongolia/153/88_H1N1:0.0019987400,(A/Mongolia/111/91__H1N1:0.0020000000,A/Mongolia/231/85_H1N1:0.0000200000):0.0000012563):0.0016877400,A/Puerto_Rico/8/1934_H1N1:0.0003122620):0.0023858900,A/Puerto_Rico/8/1934_H1N1:0.0016141100):0.0004580880,A/Puerto_Rico/8/1934_Cambridge__H1N1:0.0035419100):0.0018028900,A/Henry/1936_H1N1:0.0041971100):0.0018627900,A/Puerto_Rico/8/1934_H1N1.mu:0.0041372100):0.0070092100,A/Phila/1935_H1N1:0.0044907900):0.0054336000,(((A/Bellamy/JY2/1942_H1N1:0.0059849100,A/Bellamy/1942_H1N1:0.0050150900):0.0024121200,(((A/AA/Marton/1943_H1N1:0.0020274200,A/Hemsbury/1948_H1N1:0.0000202742):0.0008933870,A/Iowa/1943_H1N1:0.0011066100):0.0011344000,A/Netherlands/001S1/1948_H1N1:0.0008656000):0.0013378800):0.0012515500,(A/AA/Huston/1945_H1N1:0.0040196100,A/Weiss/1943_H1N1:0.0019803900):0.0021234500):0.0034414000):0.0019441300,(((A/bh/1935_H1N1:0.0089549100,((A/Wilson-Smith/1933_H1N1:0.0013099500,A/Wilson-Smith/1933_H1N1:0.0006900510):0.0059707100,(A/NWS/1934_H1N1:0.0030017500,(A/United_Kingdom/1/1933_H1N1:0.0019786500,A/Wilson-Smith/1933_H1N1:0.0000213523):0.0009982460):0.0020292900):0.0030450900):0.0005422320,A/swine/Cambridge/1/1935_H1N1:0.0084577700):0.0047265500,(A/Melbourne/1935_H1N1:0.0020000000,A/Melbourne/1/1946_H1N1:0.0000000000):0.0075234500):0.0026454700):0.0080763400):0.0072212500,((((((((((((((A/swine/Shandong/1112/2008_H1N1:0.0456819000,A/swine/Shanghai/3/2005_H1N1:0.0003180670):0.0085811600,((A/swine/Shanghai/1/2005_H1N1:0.0099581900,A/swine/Guangdong/611/2006_H1N1:0.0010418100):0.0014567400,(A/swine/Guangdong/07/2009_H1N1:0.0039636300,(A/swine/Shandong/1123/2008_H1N1:0.0039953100,(((A/swine/Guangdong/05/2009_H1N1:0.0040000000,(A/swine/Guangdong/34/2006_H1N1:0.0020000000,A/swine/Guangdong/103/2002_H1N1:0.0000200000):0.0000000000):0.0000001544,A/swine/Guangdong/01/2008_H1N1:0.0019998500):0.0000001434,A/swine/Guangdong/07/2008_H1N1:0.0019998600):0.0000046892):0.0000363720):0.0005432580):0.0011688400):0.0028306600,(A/swine/Hong_Kong/NS143/2000_H1N1:0.0061629800,(A/swine/Hong_Kong/NS1659/2001_H1N1:0.0055669800,A/swine/Hong_Kong/6250/2000_H1N1:0.0024330200):0.0018370200):0.0013568400):0.0003540450,(A/swine/Beijing/216/1992_H1N1:0.0019875700,A/swine/Beijing/94/1991_H1N1:0.0000124298):0.0001147050):0.0000997169,A/swine/Hong_Kong/299/1993_H1N1:0.0019627800):0.0006870060,(A/swine/Hong_Kong/1937/1994_H1N1:0.0014928100,A/swine/Hong_Kong/2422/1994_H1N1:0.0005071910):0.0013129900):0.0006113080,A/swine/Hong_Kong/5683/1999_H1N1:0.0100449000):0.0004478090,A/swine/Hong_Kong/7287/2000_H1N1:0.0040678200):0.0016072700,(((((((A/swine/Nebraska/00178/2003_H1N1:0.0133957000,A/swine/Ontario/11112/2004_H1N1:0.0106043000):0.0029864100,(A/swine/Korea/VDS3/2009_H1N1:0.0173559000,A/swine/Ontario/23866/04_H1N1:0.0046440800):0.0010135900):0.0019113600,(A/swine/Ontario/57561/03_H1N1:0.0067527200,A/swine/Ontario/53518/03_H1N1:0.0012472800):0.0060886400):0.0019649000,A/swine/Quebec/5393/91_H1N1:0.0120351000):0.0024596200,((((A/swine/Hong_Kong/7191/2000_H1N1:0.0098500500,A/swine/Hong_Kong/10022/2001_H1N1:0.0021499500):0.0023574200,A/swine/Hong_Kong/8278/2001_H1N1:0.0076425800):0.0014093200,(A/Wisconsin/10/1998_H1N1:0.0063370000,(((((((A/swine/MB/10422/2009_H1N1:0.0070434200,(A/swine/Hong_Kong/NS837/2001_H1N1:0.0077487500,A/swine/Hong_Kong/9656/2001_H1N1:0.0002512450):0.0029565800):0.0023991800,A/swine/Minnesota/226128/2010_H1N1:0.0066008200):0.0029135500,(A/swine/Illinois/SG1141/2003_H1N1:0.0059506400,A/swine/North_Carolina/18161/2002_H1N1:0.0040493600):0.0010864500):0.0005395740,(A/swine/Guangdong/1/2010_H1N1:0.0072082000,((A/swine/North_Carolina/SG1281/2007_H1N1:0.0039128200,((A/swine/North_Carolina/01550/2007_H1N1:0.0039084200,A/swine/South_Carolina/01414/2006_H1N1:0.0000915816):0.0029721200,(A/swine/North_Carolina/SG1255/2006_H1N1:0.0039825000,(A/swine/North_Carolina/00839/2005_H1N1:0.0000012315,A/swine/IL/00685/2005_H1N1:0):0.0000175041):0.0000278812):0.0000871843):0.0034427500,A/swine/Tennessee/00264/2004_H1N1:0.0040572500):0.0010418000):0.0004682380):0.0002776150,((A/swine/North_Carolina/47834/2000_H1N1:0.0039713600,A/swine/Kentucky/SG1167/2003_H1N1:0.0020286400):0.0020117600,A/swine/Hong_Kong/201/2010_H1N1:0.0039882400):0.0000309785):0.0002542860,(((((A/swine/Oklahoma/01139/2006_H1N1:0.0092130700,(((((A/swine/Texas/00525/2005_H1N1:0.0036796300,A/swine/Texas/SG1187/2004_H1N1:0.0003203750):0.0056162300,A/swine/Texas/SG1162/2003_H1N1:0.0003837700):0.0010212600,(A/swine/Texas/SG1271/2007_H1N1:0.0086774700,(A/swine/Texas/00867/2005_H1N1:0.0019425300,(A/swine/Texas/00195/2003_H1N1:0.0019754700,A/swine/Texas/00244/2004_H1N1:0.0000245276):0.0000574727):0.0013225300):0.0019787400):0.0009698230,(((A/swine/Oklahoma/SG1217/2005_H1N1:0.0018943000,A/swine/North_Carolina/00378/2004_H1N1:0.0001057020):0.0056720300,A/swine/Missouri/SG1182/2003_H1N1:0.0033279700):0.0012684300,(A/swine/Mexico/Qro32/2010_H1N1:0.0015000000,(A/swine/Mexico/Mex19/2010_H1N1:0.0000012300,A/swine/Mexico/Mex52/2010_H1N1:0):0.0000150000):0.0022315700):0.0005926770):0.0007635810,((A/swine/Oklahoma/00743/2005_H1N1:0.0013323000,A/swine/Oklahoma/SG1244/2006_H1N1:0.0006677020):0.0021321700,A/swine/Oklahoma/SG1188/2004_H1N1:0.0018678300):0.0012051700):0.0012869300):0.0023985700,((((((A/swine/North_Carolina/SG1279/2007_H1N1:0.0039374400,A/swine/Kansas/77778/2007_H1N1:0.0000625615):0.0006011250,A/swine/North_Carolina/01591/2007_H1N1:0.0013988700):0.0016897200,((A/swine/North_Carolina/SG1307/2008_H1N1:0.0039409800,(A/swine/North_Carolina/SG1477/2005_H1N1:0.0019831300,A/swine/North_Carolina/SG1229/2005_H1N1:0.0000168737):0.0000590219):0.0019570500,(A/swine/North_Carolina/00925/2005_H1N1:0.0029993500,(A/swine/North_Carolina/SG1313/2008_H1N1:0.0019999800,A/swine/North_Carolina/SG1479/2005_H1N1:0.0000000249):0.0000006486):0.0000429510):0.0003102770):0.0018553900,A/swine/North_Carolina/3793/2008_H1N1:0.0021446100):0.0035567000,A/swine/North_Carolina/38448-1/2005_H1N1:0.0021933000):0.0019611900,A/swine/North_Carolina/00396/2004_H1N1:0.0001638120):0.0010153700):0.0007200420,((((A/South_Dakota/03/2008_H1N1:0.0056460200,(((A/swine/Manitoba/02185/2008_H1N1:0.0029860200,A/swine/Manitoba/01781/2007_H1N1:0.0000139775):0.0017112600,A/swine/Manitoba/02947/2010_H1N1:0.0022887400):0.0021681600,(((A/swine/Minnesota/A01134336/2010_H1N1:0.0089455700,(A/swine/QC/398/2009_H1N1:0.0019811200,(A/swine/QC/1695-3/2009_H1N1:0.0019881900,A/swine/QC/1531-3/2009_H1N1:0.0000118115):0.0000188825):0.0010544300):0.0003131730,A/SW/MB/5-5/2009_H1N1:0.0036868300):0.0008345970,((A/SW/SK/11-16/2009_H1N1:0.0019838600,A/Saskatchewan/5350/2009_H1N1:0.0000161409):0.0019369500,(A/swine/QC/1488-2/2009_H1N1:0.0059975800,(A/swine/QC/370/2009_H1N1:0.0019998400,(A/swine/Oklahoma/SG1243/2006_H1N1:0.0020000000,(A/swine/QC/3399-6/2009_H1N1:0.0020000000,A/swine/North_Carolina/00371/2004_H1N1:0.0000200000):0.0000000001):0.0000001559):0.0000024235):0.0000630485):0.0001654030):0.0008162140):0.0006117950):0.0004150550,(A/swine/Saskatchewan/01974/2008_H1N1:0.0063848600,A/swine/Minnesota/02053/2008_H1N1:0.0006151430):0.0008036950):0.0004400480,(((A/swine/Michigan/A01202708/2011_H1N1:0.0039440400,(A/swine/North_Dakota/A01104053/2012_H1N1:0.0019470300,(A/swine/Iowa/A01049894/2011_H1N1:0.0019853600,(A/swine/Illinois/A01104012/2012_H1N1:0.0019818900,(A/swine/South_Dakota/A01202617/2011_H1N1:0.0019988400,A/swine/Minnesota/SG1340/2009_H1N1:0.0000011608):0.0000181081):0.0000146445):0.0000529726):0.0000559576):0.0001100310,A/swine/Illinois/A01049980/2011_H1N1:0.0018899700):0.0008047840,(A/swine/Illinois/A01301791/2012_H1N1:0.0016421900,A/swine/Illinois/A01158996/2013_H1N1:0.0003578060):0.0011952200):0.0015052600):0.0023248600,((A/swine/North_Carolina/SG1226/2005_H1N1:0.0029377000,(A/swine/Minnesota/00352/2004_H1N1:0.0017882100,A/swine/Arkansas/SG1157/2003_H1N1:0.0002117900):0.0010623000):0.0009061370,(A/swine/Virginia/01359/2006_H1N1:0.0019897400,(A/swine/Iowa/H03LJ10/2003_H1N1:0.0019864600,(A/swine/Kentucky/02116/2008_H1N1:0.0019979500,A/swine/North_Carolina/SG1172/2003_H1N1:0.0000020510):0.0000135443):0.0000102577):0.0000938626):0.0011712300):0.0005791530):0.0000185684,((((((((A/swine/North_Carolina/02023/2008_H1N1:0.0101199000,A/swine/Missouri/02060/2008_H1N1:0.0038800600):0.0009709800,(A/swine/Colorado/SG1322/2009_H1N1:0.0016060100,A/swine/Oklahoma/SG1325/2009_H1N1:0.0003939910):0.0050290200):0.0005158740,((A/swine/North_Carolina/SG1334/2009_H1N1:0.0038796500,(A/swine/North_Carolina/01855/2007_H1N1:0.0039404400,(A/swine/North_Carolina/SG1361/2010_H1N1:0.0019811100,A/swine/Kentucky/SG1277/2007_H1N1:0.0000188884):0.0000595637):0.0001203520):0.0010370600,(A/swine/Minnesota/02475/2008_H1N1:0.0019427100,A/swine/Illinois/02166/2008_H1N1:0.0000572928):0.0009629400):0.0004841260):0.0004633820,((((((((A/swine/Ohio/12TOSU45/2012_H1N1:0.0010000000,A/swine/Ohio/12TOSU44/2012_H1N1:0):0.0099493300,A/swine/Indiana/A01260029/2012_H1N1:0.0000506716):0.0018080300,(A/swine/Minnesota/02817/2009_H1N1:0.0019036200,A/swine/MN/23506/2009_H1N1:0.0000963847):0.0011919700):0.0014354900,A/swine/Minnesota/SG1317/2008_H1N1:0.0005645150):0.0003315970,((((A/swine/Indiana/A01260209/2013_H1N1:0.0040126300,A/swine/Indiana/A01243254/2012_H1N1:0.0039873700):0.0019571000,(A/swine/Michigan/A01203374/2012_H1N1:0.0020000000,A/swine/Indiana/A00968365/2012_H1N1:0.0000000000):0.0000429015):0.0017055600,A/swine/Indiana/A01202622/2011_H1N1:0.0012944400):0.0004809330,((((((A/swine/Minnesota/A01047613/2010_H1N1:0.0090000000,A/swine/Arkansas/SG1327/2009_H1N1:0.0009999970):0.0009999970,(A/swine/Indiana/13TOSU486/2013_H1N1:0.0040000000,(A/swine/Iowa/A01203809/2012_H1N1:0.0010000000,A/swine/Arkansas/SG1323/2009_H1N1:0.0000000001):0.0000000015):0.0000000026):0.0000000149,(A/swine/Illinois/A01158994/2013_H1N1:0.0009999960,A/swine/Illinois/A01244401/2012_H1N1:0.0000000041):0.0019999900):0.0000001306,A/swine/Indiana/A01260109/2012_H1N1:0.0029998700):0.0000185855,A/swine/Nebraska/A01301493/2012_H1N1:0.0019814100):0.0000347619,(A/swine/Minnesota/SG1404/2011_H1N1:0.0019932400,A/Wisconsin/28/2011_H1N1:0.0000067618):0.0019652400):0.0004565670):0.0003246530):0.0000947170,(A/swine/Oklahoma/SG1500/2010_H1N1:0.0029966700,(A/swine/Oklahoma/SG1251/2010_H1N1:0.0019504800,A/swine/Minnesota/001200/2006_H1N1:0.0000495196):0.0010033300):0.0009521580):0.0000537834,(A/swine/Nebraska/A01271157/2012_H1N1:0.0019929900,(A/swine/Arkansas/01460/2007_H1N1:0.0019984700,A/swine/Minnesota/00938/2005_H1N1:0.0000015327):0.0000070076):0.0000165291):0.0000264084,A/swine/Illinois/02238/2008_H1N1:0.0039735900):0.0000248988):0.0001827250,((A/swine/Iowa/H02PW7/2002_H1N1:0.0035813500,A/swine/Illinois/02510/2009_H1N1:0.0024186500):0.0012118200,A/swine/Minnesota/00574/2005_H1N1:0.0017881800):0.0003231350):0.0001505840,((A/swine/Minnesota/001581/2007_H1N1:0.0030184900,A/swine/Korea/VDS4/2008_H1N1:0.0029815100):0.0003446990,A/swine/Texas/01522/2007_H1N1:0.0006553010):0.0015349600):0.0001607600,(A/swine/North_Carolina/SG1387/2011_H1N1:0.0023773600,A/swine/North_Carolina/SG1168/2003_H1N1:0.0006226440):0.0016683400):0.0001775270,(((A/swine/Colorado/SG1185/2004_H1N1:0.0045881800,A/swine/North_Carolina/SG1278/2007_H1N1:0.0004118170):0.0006535140,A/swine/Minnesota/00401/2004_H1N1:0.0003464860):0.0008860340,((((((A/Iowa/CEID23/2005_H1N1:0.0038416500,(A/swine/Iowa/H04YS2/2004_H1N1:0.0019368600,A/swine/Minnesota/01136/2006_H1N1:0.0000631359):0.0001583490):0.0018912700,(A/swine/Iowa/00250/2004_H1N1:0.0019721700,A/swine/Minnesota/SG1209/2004_H1N1:0.0000278266):0.0001087340):0.0019233200,(((A/swine/Minnesota/SG1470/2004_H1N1:0.0051301200,A/swine/Minnesota/SG1210/2004_H1N1:0.0008698820):0.0009201490,(A/swine/Minnesota/01358/2006_H1N1:0.0019565000,A/swine/Minnesota/SG1237/2005_H1N1:0.0000434997):0.0000798509):0.0019553500,A/swine/Minnesota/SG1144/2006_H1N1:0.0000446493):0.0000766839):0.0001008390,A/swine/Minnesota/SG1177/2003_H1N1:0.0018991600):0.0017048800,A/swine/North_Carolina/SG1202/2004_H1N1:0.0017951200):0.0002115010,(((A/swine/Iowa/H03G1/2003_H1N1:0.0019880200,A/swine/Iowa/H03US3/2003_H1N1:0.0000119842):0.0019990100,(((A/swine/North_Carolina/SG1170/2003_H1N1:0.0020000000,A/swine/Oklahoma/00130/2003_H1N1:0.0020000000):0.0000000028,A/swine/North_Carolina/00850/2005_H1N1:0.0020000000):0.0000200000,A/swine/Minnesota/SG1138/2002_H1N1:0.0000000039):0.0000009936):0.0000049490,(A/swine/Iowa/H02NJ56391/2002_H1N1:0.0010062300,A/swine/Korea/CAN01/2004_H1N1:0.0009937740):0.0009944560):0.0000348030):0.0000753064):0.0000563757):0.0002893000):0.0014147500,A/swine/Illinois/02626/2009_H1N1:0.0006390950):0.0004845410):0.0002273070,A/swine/Texas/01657/2007_H1N1:0.0046003000):0.0005433950):0.0013907200):0.0018808200,((A/swine/Wisconsin/238/97_H1N1:0.0020302800,A/chicken/NY/21665-73/1998_H1N1:0.0019697200):0.0017724100,(A/Swine/Wisconsin/457/98_H1N1:0.0057977300,(A/swine/Hubei/02/2008_H1N1:0.0020000000,A/Maryland/12/1991_H1N1:0.0000000000):0.0002022720):0.0002275920):0.0015772800):0.0000752265):0.0004460110,(A/swine/Alberta/56626/03_H1N1:0.0078751400,A/swine/Nebraska/1/1992_H1N1:0.0001248570):0.0015574700):0.0007042370,A/turkey/IA/10271-3/1990_H1N1:0.0056260600):0.0006118780):0.0003838720,((((A/swine/Hong_Kong/1795/1994_H1N1:0.0015783600,A/swine/Hong_Kong/1286/1993_H1N1:0.0004216450):0.0036284100,A/swine/Hong_Kong/103/1993_H1N1:0.0003715900):0.0038672200,(A/swine/Iowa/2/1987_H1N1:0.0058802300,(((((A/swine/Wisconsin/1915/1988_H1N1:0.0151169000,A/Swine/Indiana/1726/1988_H1N1:0.0018830800):0.0010174500,((A/swine/Iowa/1/1987_H1N1:0.0019436100,A/swine/Iowa/3/1985_H1N1:0.0000563869):0.0019314800,A/swine/Kansas/3228/1987_H1N1:0.0000685246):0.0009825470):0.0022905200,(A/Swine/Wisconsin/235/97_H1N1:0.0075106900,(A/Swine/Wisconsin/168/97_H1N1:0.0018906200,(A/Swine/Wisconsin/164/97_H1N1:0.0019178700,A/Swine/Wisconsin/163/97_H1N1:0.0000821256):0.0001093760):0.0034893100):0.0019594800):0.0002449430,(A/Ohio/3523/1988_H1N1:0.0019913800,A/Ohio/3559/1988_H1N1:0.0000086242):0.0018800600):0.0001684230,((A/swine/Wisconsin/125/97_H1N1:0.0019876000,A/Swine/Wisconsin/136/97_H1N1:0.0000123971):0.0029890500,(A/swine/Guangxi/12/2005_H1N1:0.0029998200,(A/Maryland/12/1991_H1N1:0.0020000000,A/Wisconsin/3523/1988_H1N1:0.0000000016):0.0000001760):0.0000109542):0.0000815771):0.0000572665):0.0001640310):0.0001382490,A/swine/Iowa/24297/1991_H1N1:0.0018617500):0.0010713600):0.0012878600,((((A/swine/Hong_Kong/762/2002_H1N1:0.0017867400,A/swine/Hong_Kong/NS1022/2001_H1N1:0.0002132620):0.0041328100,((A/swine/Hong_Kong/NS1586/2001_H1N1:0.0035658600,(((A/swine/Hong_Kong/9303/2001_H1N1:0.0059639200,(A/swine/Hong_Kong/NS885/2001_H1N1:0.0019586100,(A/swine/Hong_Kong/NS9/2000_H1N1:0.0019871900,(A/swine/Hong_Kong/227/2002_H1N1:0.0030000000,A/swine/Hong_Kong/6301/2000_H1N1:0.0000000040):0.0000128149):0.0000413898):0.0000360846):0.0000292995,A/swine/Hong_Kong/1733/2002_H1N1:0.0019707000):0.0001599540,A/swine/Hong_Kong/7945/2000_H1N1:0.0018400500):0.0004341370):0.0016320400,A/swine/Hong_Kong/NS1344/2001_H1N1:0.0003679580):0.0008671920):0.0082806700,A/swine/Hong_Kong/8709/2001_H1N1:0.0046880800):0.0008289890,(A/turkey/Minnesota/12537/1989_H1N1:0.0039704300,(A/Wisconsin/3623/1988_H1N1:0.0039856300,((A/turkey/North_Carolina/1790/1988_H1N1:0.0039969700,(A/turkey/NC/17026/1988_H1N1:0.0019999800,A/swine/Iowa/31483/1988_H1N1:0.0000000233):0.0000030295):0.0000225608,A/turkey/NC/19762/1988_H1N1:0.0019774400):0.0000143739):0.0000295660):0.0011710100):0.0004631100):0.0018751500,(((A/swine/Okinawa/2/2005_H1N1:0.0029893200,A/swine/Okinawa/1/2005_H1N1:0.0000106762):0.0129221000,A/swine/Iowa/1/1986_H1N1:0.0030779300):0.0019019100,(((A/swine/England/283902/1993_H1N1:0.0077556800,(A/swine/England/117316/1986_H1N1:0.0019127300,(A/swine/England/79851/1990_H1N1:0.0019927500,A/swine/England/114065/1990_H1N1:0.0000072464):0.0000872736):0.0042443200):0.0044360600,(((((((A/swine/Wisconsin/1/1971_H1N1:0.0077126600,A/swine/Kyoto/3/1979_H1N1:0.0062873400):0.0010641800,((A/swine/Niigata/1/1977_H1N1:0.0051457400,A/swine/Iowa/1/1977_H1N1:0.0028542600):0.0016201700,(A/swine/Hokkaido/2/1981_H1N1:0.0056250000,(A/swine/Arizona/148/1977_H1N1:0.0019000200,A/swine/Iowa/4/1976_H1N1:0.0000999844):0.0003749950):0.0003798270):0.0014358200):0.0007952540,(((((A/swine/Wisconsin/1/1957_H1N1:0.0038436200,(A/swine/Wisconsin/1/1961_H1N1:0.0019924200,A/swine/Wisconsin/1/1961_H1N1:0.0000075758):0.0001563840):0.0019262600,(A/swine/Wisconsin/2/1966_H1N1:0.0019821100,(A/swine/Wisconsin/1/1967_H1N1:0.0019874400,A/swine/Wisconsin/1/1967_H1N1:0.0000125591):0.0000178897):0.0000737382):0.0010375500,(A/swine/Hong_Kong/51/1977_H1N1:0.0020142300,A/swine/Illinois/1/1975_H1N1:0.0019857700):0.0009624540):0.0012875100,(A/swine/Hong_Kong/48/1977_H1N1:0.0019832200,A/swine/Hong_Kong/39/1977_H1N1:0.0000167752):0.0007124860):0.0003075800,(((A/New_Jersey/8/1976_H1N1:0.0039963900,(A/New_Jersey/8/1976_H1N1:0.0040000000,A/New_Jersey/8/1976_H1N1:0.0000000000):0.0000036101):0.0019600800,A/New_Jersey/11/1976_H1N1:0.0000399249):0.0039035300,(((A/swine/Hong_Kong/58/1977_H1N1:0.0019960200,((A/swine/Hong_Kong/44/1977_H1N1:0.0020000000,A/swine/Hong_Kong/67/1977_H1N1:0.0020000000):0.0000000000,A/swine/Hong_Kong/62/1977_H1N1:0):0.0000039841):0.0019611200,(((((((A/swine/Hong_Kong/63/1977_H1N1:0.0020000000,A/swine/Hong_Kong/64/1977_H1N1:0.0000200000):0.0040000000,A/swine/Iowa/1/1976_H1N1:0.0010000000):0.0000004017,A/swine/Tennessee/19/1976_H1N1:0.0019996000):0.0000003302,(A/swine/Italy/437/1976_H1N1:0.0000024570,A/swine/Hong_Kong/47/1977_H1N1:0):0):0.0000004225,A/swine/Tennessee/3/1978_H1N1:0.0019995800):0.0000165853,A/swine/Italy/147/1981_H1N1:0.0019834100):0.0000514276,A/swine/Wisconsin/30954/1976_H1N1:0.0019485700):0.0000388816):0.0000455915,A/swine/Minnesota/24/1975_H1N1:0.0019544100):0.0000964686):0.0006914430):0.0002521090):0.0003426510,((A/swine/Hong_Kong/27/1977_H1N1:0.0019951600,A/swine/Hong_Kong/28/1977_H1N1:0.0000048389):0.0017377300,(A/swine/Hong_Kong/26/1977_H1N1:0.0020000000,A/swine/Hong_Kong/25/1977_H1N1:0.0000000000):0.0002622700):0.0035089100):0.0006226410,A/swine/Italy/2/1979_H1N1:0.0002523590):0.0007051270,A/swine/Italy/141/1981_H1N1:0.0058573700):0.0005897590,(A/turkey/Kansas/4880/1980__H1N1:0.0037798000,(A/swine/Quebec/192/81_H1N1:0.0039306800,(A/swine/Hong_Kong/95/1979_H1N1:0.0019955600,(A/swine/Ontario/2/1981_H1N1:0.0019997200,A/swine/Tennessee/24/1977_H1N1:0.0000002840):0.0000044445):0.0000693241):0.0002202000):0.0014180500):0.0001611080):0.0012737700,(A/swine/Minnesota/5892-7/1979_H1N1:0.0019982200,A/swine/Wisconsin/641/1980_H1N1:0.0000017786):0.0010428800):0.0012169800):0.0011179600):0.0195361000,(((((((A/swine/Iowa/1946_H1N1:0.0025979500,A/swine/Iowa/1976/1931_H1N1:0.0014020500):0.0043166000,((A/swine/Guangdong/L3/2009_H1N1:0.0055517200,A/swine/USA/1976/1931_H1N1:0.0014482800):0.0012337200,A/swine/London/Scholtissek_lab_H1N1:0.0007662810):0.0026834000):0.0016734600,A/swine/41/1949_H1N1:0.0003265380):0.0018235000,A/swine/Jamesburg/1942_H1N1:0.0001765020):0.0004890350,A/swine/Iowa/15/1930_H1N1:0.0045109700):0.0067042700,(A/swine/Ohio/23/1935_H1N1:0.0060988300,A/swine/29/1937_H1N1:0.0059011700):0.0012488600):0.0015017300,A/swine/May/1954_H1N1:0.0104358000):0.0023182700):0.0053511800,((((((((((((((((((((A/swine/Jiangsu/zg8/2010_H1N1:0.0626716000,A/swine/Jiangsu/zg3/2010_H1N1:0.0083284300):0.0011814500,A/swine/Jiangsu/zg10/2010_H1N1:0.0078185500):0.0020599200,((((A/swine/Jiangsu/zg4/2010_H1N1:0.0060340700,A/swine/Jiangsu/zg17/2011_H1N1:0.0039659300):0.0018587700,A/swine/Jiangsu/S30/2011_H1N1:0.0021412300):0.0010557300,A/swine/Jiangsu/zg6/2010_H1N1:0.0009442690):0.0009589790,(A/swine/Hong_Kong/1780/2008_H1N1:0.0019630200,(((A/swine/Jiangsu/s16/2011_H1N1:0.0039930900,(A/swine/Jiangsu/s15/2011_H1N1:0.0019865100,A/swine/Jiangsu/S14/2011_H1N1:0.0000134875):0.0000069123):0.0000129781,A/swine/Shaanxi/s3/2012_H1N1:0.0019870200):0.0000438381,A/swine/Hong_Kong/71/2009_H1N1:0.0009561620):0.0000369798):0.0000410214):0.0005338310):0.0008459320,(A/swine/Hong_Kong/2896/2009_H1N1:0.0012751500,(A/swine/Hong_Kong/255/2009_H1N1:0.0004881400,(A/swine/Hong_Kong/248/2009_H1N1:0.0003478530,A/swine/Hong_Kong/245/2009_H1N1:0):0.0000118596):0.0009748540):0.0012321900):0.0012302300,((((((A/swine/Hubei/104/2009_H1N1:0.0039775200,(A/swine/Hubei/101/2009_H1N1:0.0019972500,A/swine/Hubei/01/2009_H1N1:0.0000027472):0.0000224806):0.0009086950,A/swine/Hubei/03/2009_H1N1:0.0010913100):0.0029534500,A/swine/Hong_Kong/61/2008_H1N1:0.0010465500):0.0007253480,(A/swine/Hong_Kong/3001/2009_H1N1:0.0026229600,A/swine/Hong_Kong/NS1179/2007_H1N1:0.0013770400):0.0012746500):0.0017105100,(((((A/swine/Liaoning/32/2006_H1N1:0.0094123700,(A/swine/Shandong/101/2008_H1N1:0.0119873000,(A/swine/Shandong/327/2009_H1N1:0.0049793600,(A/swine/Shandong/275/2009_H1N1:0.0060000000,A/swine/Fujian/204/2007_H1N1:0.0000600000):0.0000206379):0.0000127029):0.0015876300):0.0004564690,((A/swine/Beijing/21/2008_H1N1:0.0018330200,A/swine/Beijing/26/2008_H1N1:0.0001669760):0.0029435000,(A/swine/Zhejiang/1/2007_H1N1:0.0059356200,(A/swine/Shandong/128/2008_H1N1:0.0020000000,A/swine/Hong_Kong/170/2006_H1N1:0.0000000000):0.0000643800):0.0000565039):0.0000435314):0.0007490460,A/swine/Hong_Kong/1683/2005_H1N1:0.0037509500):0.0001261860,(A/swine/Hong_Kong/434/2006_H1N1:0.0059932800,A/swine/Hong_Kong/NS120/2007_H1N1:0.0020067200):0.0001238140):0.0004047380,(A/swine/Hong_Kong/NS952/2008_H1N1:0.0030917300,(A/swine/Hong_Kong/1791/2006_H1N1:0.0020653300,A/swine/Hong_Kong/435/2007_H1N1:0.0009346720):0.0009082680):0.0024702600):0.0001019870):0.0005113460,A/swine/Hong_Kong/1716/2006_H1N1:0.0017386500):0.0000634760):0.0008323070,A/swine/Hong_Kong/2433/2009_H1N1:0.0058489700):0.0024002600,((((A/swine/Jiangsu/zg9/2010_H1N1:0.0130052000,(A/swine/Jiangsu/zg5/2010_H1N1:0.0019995200,A/swine/Jiangsu/zg13/2011_H1N1:0.0000004753):0.0019947800):0.0014316100,((A/swine/Jiangsu/zg2/2010_H1N1:0.0039778700,A/swine/Jiangsu/zg1/2010_H1N1:0.0000221281):0.0031028000,(A/swine/Jiangsu/zg16/2011_H1N1:0.0019963900,(A/swine/Jiangsu/zg14/2011_H1N1:0.0029937600,(A/swine/Jiangsu/zg12/2011_H1N1:0.0019980800,A/swine/Jiangsu/zg18/2011_H1N1:0.0000019157):0.0000062380):0.0000036058):0.0018972000):0.0011933900):0.0006095950,(A/swine/Hunan/26/2010_H1N1:0.0039444100,(A/Jiangsu/ALS1/2011_H1N1:0.0030000000,(((A/swine/Shaanxi/sf/2011_H1N1:0.0020000000,A/swine/Shaanxi/s2/2012_H1N1:0.0000200000):0.0020000000,A/swine/Jiangsu/zg7/2010_H1N1:0.0000000000):0.0000000000,A/swine/Jiangsu/zg15/2011_H1N1:0.0020000000):0.0000000020):0.0000555904):0.0000779054):0.0007334670,A/swine/Jiangsu/40/2011_H1N1:0.0012665300):0.0013606100):0.0008130480,A/swine/Hong_Kong/NS376/2006_H1N1:0.0034823000):0.0012915800,(A/swine/Hong_Kong/676/2008_H1N1:0.0040035100,A/swine/Hong_Kong/421/2006_H1N1:0.0039964900):0.0017513900):0.0026922900,((A/swine/Hong_Kong/404/2005_H1N1:0.0019389400,(A/swine/Hong_Kong/NS210/2005_H1N1:0.0019906400,(A/swine/Hong_Kong/424/2004_H1N1:0.0019854100,A/swine/Hong_Kong/NS1170/2004_H1N1:0.0000145896):0.0000093608):0.0000610620):0.0054079400,(((((A/swine/Guangdong/1604/2010_H1N1:0.0039745300,A/swine/Hong_Kong/72/2007_H1N1:0.0020254700):0.0013505300,((A/swine/Hong_Kong/247/2009_H1N1:0.0067945400,((A/swine/Hong_Kong/1422/2009_H1N1:0.0019899000,A/swine/Hong_Kong/NS1054/2009_H1N1:0.0000101010):0.0019722400,A/swine/Hong_Kong/1559/2008_H1N1:0.0010277600):0.0002054640):0.0001270270,A/swine/Hong_Kong/414/2009_H1N1:0.0000012703):0.0006494730):0.0007472240,(A/swine/Hong_Kong/2481/2009_H1N1:0.0039472700,A/swine/Hong_Kong/NS613/2009_H1N1:0.0000527342):0.0022527800):0.0020238900,(A/swine/Italy/1369-7/1994_H1N1:0.0036996200,((A/swine/Hong_Kong/275/2005_H1N1:0.0039999700,A/swine/Hong_Kong/8512/2001_H1N1:0.0000000334):0.0000215314,A/swine/Hong_Kong/NS129/2003_H1N1:0.0019784700):0.0013003800):0.0009761110):0.0005695160,(A/swine/Hong_Kong/NS318/2004_H1N1:0.0039402300,A/swine/Hong_Kong/638/2003_H1N1:0.0000597707):0.0013054800):0.0005295640):0.0012802100):0.0007458660,(((((A/swine/Thailand/CB069/2010_H1N1:0.0079852800,A/swine/Ratchaburi/NIAH1481/2000_H1N1:0.0050147200):0.0005021820,((A/swine/Ratchaburi/NIAH101942/2008_H1N1:0.0008160490,A/swine/Ratchaburi/NIAH101942/2008_H1N1:0):0.0016138100,(A/swine/Chonburi/NIAH589/2005_H1N1:0.0039199100,(A/swine/Saraburi/NIAH100761-22/2009_H1N1:0,A/swine/Saraburi/NIAH116625-11/2009_H1N1:0):0.0000800943):0.0003861910):0.0044978200):0.0003740480,(A/swine/Italy/1513-1/1998_H1N1:0.0035419300,A/swine/Brno/00/2000_H1N1:0.0014580700):0.0006259520):0.0005770220,(A/swine/Cotes_dArmor/1488/1999_H1N1:0.0055992600,(A/swine/Germany/Vi5698/1995_H1N1:0.0039869400,(A/swine/Lutol/3/2000_H1N1:0.0019977400,A/swine/Ille_et_Vilaine/1455/1999_H1N1:0.0000022630):0.0000130612):0.0004007420):0.0004229780):0.0005763870,(A/swine/Schleswig-Holstein/1/1993_H1N1:0.0037658600,A/swine/Germany/8533/1991_H1N1:0.0022341400):0.0013923600):0.0012196900):0.0007662610,((A/swine/Thailand/CU-RA204/2010_H1N1:0.0100762000,((A/swine/Chonburi/NIAH9469/2004_H1N1:0.0016615700,A/swine/Chonburi/NIAH977/2004_H1N1:0.0003384310):0.0055086200,(A/swine/Thailand/CB001/2009_H1N1:0.0064045600,A/swine/Ratchaburi/NIAH550/2003_H1N1:0.0015954400):0.0004913790):0.0024237600):0.0005508670,A/swine/Finnistere/800/2004_H1N1:0.0051991300):0.0004144520):0.0011493300,((A/Swine/Spain/50047/2003_H1N1:0.0130537000,A/swine/Denmark/14348-3/2003_H1N1:0.0089463200):0.0037452600,(((A/swine/Belgium/1/1998_H1N1:0.0047257000,(A/swine/Italy/289171/2003_H1N1:0.0038398400,A/swine/Italy/151672-3/2003_H1N1:0.0001601560):0.0012743000):0.0093182700,A/swine/Bieganow/1/2001_H1N1:0.0096817300):0.0004103950,A/swine/Cotes_dArmor/1624/2002_H1N1:0.0085896100):0.0010047400):0.0002839740):0.0015025400,(((((A/swine/England/1093/2005_H1N1:0.0033797100,A/swine/England/453/2006_H1N1:0.0006202900):0.0004652710,A/swine/England/383/2005_H1N1:0.0015347300):0.0056352100,(((A/swine/England/57610/1999_H1N1:0.0030015200,A/swine/England/39572/2001_H1N1:0.0029984800):0.0014224500,A/swine/England/004772/2001_H1N1:0.0005775480):0.0015546000,A/swine/England/17787/2000_H1N1:0.0014454000):0.0003647880):0.0030996400,A/swine/England/193667/1998_H1N1:0.0082753600):0.0013884400,(((A/swine/England/101692/1997_H1N1:0.0077038700,(((((A/swine/England/410711/1994_H1N1:0.0114172000,A/swine/England/745769/1995_H1N1:0.0035828300):0.0005131830,((A/swine/England/17788/2000_H1N1:0.0053983200,A/swine/England/254/2002_H1N1:0.0046016800):0.0004512870,(A/swine/England/010402/2003_H1N1:0,A/swine/England/1131/2004_H1N1:0):0.0025487100):0.0009868170):0.0003437760,((A/swine/England/425742/1994_H1N1:0.0060255500,A/swine/England/35320/1999_H1N1:0.0049744500):0.0009793130,(A/swine/England/279053/1993_H1N1:0.0019618400,(A/swine/England/195852/1992_H1N1:0.0019964500,A/swine/England/195852/1992_H1N1:0.0000035484):0.0000381635):0.0000206873):0.0004062240):0.0010324700,((A/swine/England/167655/1997_H1N1:0.0015149000,A/swine/England/636804/1996_H1N1:0.0004851030):0.0026771900,A/swine/England/68327/1998_H1N1:0.0033228100):0.0007800300):0.0006689210,A/swine/England/771270/1995_H1N1:0.0014248300):0.0002961260):0.0007143920,A/turkey/Germany/3/91_H1N1:0.0072231100):0.0004003950,A/swine/Italy/839/1989_H1N1:0.0036308600):0.0004509130):0.0001442530):0.0008127310,A/swine/Italy/172336/2001_H1N1:0.0080993100):0.0007147910,(((A/swine/Italy/73449/2013_H1N1:0.0073625200,(((A/swine/Greven/IDT2889/2004_H1N1:0.0019148600,A/swine/Spain/51915/2003_H1N1:0.0000851430):0.0030028800,A/swine/Germany/SIV05/2007_H1N1:0.0029971200):0.0012596100,A/swine/Italy/218884-2/2012_H1N1:0.0047403900):0.0006374770):0.0006739830,(((A/swine/Gent/112/2007_H1N1:0.0056080900,((A/swine/Italy/159870-2/2005_H1N1:0.0053148400,A/swine/Spain/53207/2004_H1N1:0.0006851610):0.0007688320,A/swine/Italy/186678-2/2005_H1N1:0.0012311700):0.0003919060):0.0003162980,A/swine/Hungary/19774/2006_H1N1:0.0036837000):0.0009022490,A/Switzerland/5165/2010_H1N1:0.0030977500):0.0014510200):0.0032686700,(A/swine/Haseluenne/IDT2617/2003_H1N1:0.0039902400,A/swine/Haseluenne/IDT2617/2003_H1N1:0.0000097625):0.0066688300):0.0020631500):0.0064677200,((((A/swine/OMS/2111/1995_H1N1:0.0046088400,A/swine/OMS/2112/1995_H1N1:0.0033911600):0.0090437900,(A/swine/Italy/670/1987_H1N1:0.0013867700,A/swine/Italy/671/1987_H1N1:0.0006132320):0.0009562090):0.0009363760,(A/swine/Netherlands/12/1985_H1N1:0.0045018100,A/swine/Finnistere/2899/1982_H1N1:0.0034981900):0.0010636200):0.0011342100,A/swine/Germany/2/1981_H1N1:0.0038657900):0.0028263500):0.0047646400,(((A/turkey/England/647/1977_H1N1:0.0208503000,((((((A/mallard/Maryland/334/2002_H1N1:0.0032731700,A/mallard/Maryland/321/2002_H1N1:0.0007268280):0.0036384600,A/mallard/Maryland/307/2002_H1N1:0.0023615400):0.0036578800,(A/duck/Italy/281904/2006_H1N1:0.0184065000,((A/muscovy_duck/New_York/21211-5/2005_H1N1:0.0028286500,A/ruddy_turnstone/New_Jersey/AI09-846/2009_H1N1:0.0021713500):0.0007350710,A/ruddy_turnstone/New_Jersey/AI09-1292/2009_H1N1:0.0022649300):0.0005935360):0.0008421220):0.0022403500,((((A/turkey/MO/21939/1987_H1N1:0.0059822800,(((A/mallard/Maryland/42/2003_H1N1:0.0069868600,A/mallard/Minnesota/AI09-1678/2009_H1N1:0.0010131400):0.0005870780,(((A/turkey/Minnesota/1661/1981_H1N1:0.0049970600,A/blue_winged_teal/TX/43/2002_H1N1:0.0000029350):0.0000093161,A/northern_pintail/Texas/421716/2001_H1N1:0.0019906800):0.0000076777,A/mallard/Alberta/267/1996_H1N1:0.0019923200):0.0014129200):0.0007825440,((((A/blue-winged_teal/LA/B228/1986_H1N1:0.0010137300,A/turkey/SD/7034/1986_H1N1:0.0009862680):0.0009791910,A/blue-winged_teal/Alberta/69/1987_H1N1:0.0000208091):0.0035694800,(A/mallard/California/5351/2009_H1N1:0.0019758100,(A/mallard/Mississippi/10OS4494/2010_H1N1:0.0009999730,A/mallard/Alberta/211/1998_H1N1:0.0000000272):0.0000241897):0.0004305240):0.0008815560,(((((A/green_winged_teal/Louisiana/Sg-00090/2007_H1N1:0.0038820500,A/gull/Delaware/428/2009_H1N1:0.0031179500):0.0015096000,((A/duck/NJ/7717-70/1995_H1N1:0.0029275000,((A/canvasback/Alberta/276/2005_H1N1:0.0019734900,(A/mallard/Alberta/88/2004_H1N1:0.0019898300,(A/northern_shoveler/Interior_Alaska/7MP1081/2007_H1N1:0.0019980200,A/mallard/Alberta/65/1976_H1N1:0.0000019821):0.0000101655):0.0000265121):0.0000271425,A/American_green-winged_teal/Wisconsin/2743/2009_H1N1:0.0009728570):0.0000725046):0.0008092410,A/pintail_duck/ALB/219/1977_H1N1:0.0011907600):0.0004904040):0.0004151590,((A/blue-winged_teal/Alberta/141/1992_H1N1:0.0039033500,A/mallard/California/8843/2008_H1N1:0.0000966451):0.0009650180,(A/American_black_duck/Nova_Scotia/00083/2010_H1N1:0.0019916000,(A/American_black_duck/New_Brunswick/00410/2010_H1N1:0.0019899500,A/pintail_duck/ALB/238/1979_H1N1:0.0000100536):0.0000084006):0.0010349800):0.0008348410):0.0002553280,((A/mallard/Ohio/11OS2016/2011_H1N1:0.0019915000,(A/mallard/Ohio/11OS2120/2011_H1N1:0.0019959800,(A/mallard/Ohio/11OS2128/2011_H1N1:0.0019973400,A/mallard/Ohio/11OS1991/2011_H1N1:0.0000026587):0.0000040190):0.0000084961):0.0019673900,(A/unknown/New_York/1971-40/1998_H1N1:0.0026822300,(A/ruddy_turnstone/New_Jersey/AI09-256/2009_H1N1:0.0014675100,A/ruddy_turnstone/Delaware/AI09-1221/2009_H1N1:0.0005324940):0.0013177700):0.0010326100):0.0003071720):0.0000216442,((A/American_black_duck/New_Brunswick/01989/2007_H1N1:0.0059343500,(((A/mallard/Maryland/168/2002_H1N1:0.0019752900,((A/mallard/Maryland/352/2002_H1N1:0.0000067319,A/mallard/Maryland/350/2002_H1N1:0):0.0019799700,(A/mallard/Maryland/390/2002_H1N1:0.0020000000,A/mallard/Maryland/161/2002_H1N1:0.0000200000):0.0000200303):0.0000247082):0.0009918410,(A/bufflehead/Maine/161/2011_H1N1:0.0019626200,A/mallard/Ohio/4809-9/2008_H1N1:0.0000373840):0.0010081600):0.0009780300,(((((A/mallard/Minnesota/Sg-0617/2008_H1N1:0.0019878500,A/mallard/Minnesota/Sg-00628/2008_H1N1:0.0000121463):0.0029982200,(A/mallard/Minnesota/AI07-3136/2007_H1N1:0.0019983200,(A/mallard/Interior_Alaska/8BM2102/2008_H1N1:0.0019966500,(A/mallard/Alberta/322/1988_H1N1:0.0019991200,(A/mallard/Ohio/11OS2078/2011_H1N1:0.0019983800,(A/mallard/Minnesota/AI07-3127/2007_H1N1:0.0019989800,(A/shorebird/Delaware_Bay/50/2002_H1N1:0.0019987000,(A/mallard/Ohio/56/1999_H1N1:0.0019996800,(A/American_green-winged_teal/Mississippi/11OS256/2011_H1N1:0.0019999900,(A/mallard/Washington/44338-218/2007_H1N1:0.0030000000,A/mallard/Alberta/35/1976_H1N1:0.0000300000):0.0000000143):0.0000003222):0.0000013018):0.0000010223):0.0000016214):0.0000008827):0.0000033491):0.0000016810):0.0000017786):0.0000060989,A/green-winged_teal/California/96/2012_H1N1:0.0019939000):0.0000089415,A/greater_white-fronted_goose/California/10936/2008_H1N1:0.0019910600):0.0000105266,A/shorebird/Delaware/246/2006_H1N1:0.0019894700):0.0000219698):0.0000656454):0.0000836550,A/mallard/Alberta/151/2002_H1N1:0.0009163450):0.0001336290):0.0000994012):0.0000865962):0.0000880327):0.0001962830,(A/ruddy_turnstone/New_Jersey/AI09-841/2009_H1N1:0.0030870300,A/mallard/Interior_Alaska/7MP0172/2007_H1N1:0.0019129700):0.0008017640):0.0004856510,A/green-winged_teal/Ohio/430/1987_H1N1:0.0014528300):0.0003153890,A/northern_pintail/California/3452/2010_H1N1:0.0016494500):0.0003744860):0.0003155200,((((A/oystercatcher/Germany/87_H1N1:0.0078800100,A/mallard/New_Zealand/275-15/2005_H1N1:0.0021199900):0.0013869700,((A/northern_pintail/Aomori/478/2003_H1N1:0.0019914500,A/duck/Italy/69238/2007_H1N1:0.0000085463):0.0009096210,A/duck/Australia/749/1980_H1N1:0.0010903800):0.0006130330):0.0006817580,(((((A/goose/Italy/296426/2003_H1N1:0.0023635400,A/ruddy_turnstone/Delaware_Bay/123/1994_H1N1:0.0016364600):0.0013941300,A/green-winged_teal/California/2940/2011_H1N1:0.0026058700):0.0003738480,A/mallard/Alberta/166/2006_H1N1:0.0018761500):0.0000490590,(((A/mallard/Ohio/171/1990_H1N1:0.0016722500,A/unknown/New_York/16922/2006_H1N1:0.0013277500):0.0012621100,(A/mallard/Alberta/204/2002_H1N1:0.0016727500,A/Muscovy_duck/New_York/97382-2/2005_H1N1:0.0013272500):0.0012378900):0.0000640653,(A/mallard/Maryland/26/2003_H1N1:0.0020000000,A/mallard/Maryland/403/2002_H1N1:0.0000200000):0.0006859350):0.0003259410):0.0000442066,(A/mallard/Bavaria/185-8/2008_H1N1:0.0019841300,(A/duck/Shimane/188/1999_H1N1:0.0019911300,A/duck/Bavaria/2/1977_H1N1:0.0000088691):0.0000158660):0.0000807934):0.0002869920):0.0003369370,(A/pintail/Aomori/794/2008_H1N1:0.0021454800,A/blue-winged_teal/North_Dakota/Sg-00735/2008_H1N1:0.0018545200):0.0015536900):0.0000650454):0.0005847260,A/mallard/Maryland/41/2003_H1N1:0.0025560900):0.0003332270):0.0005639750,(A/duck/NY/13152-13/1994_H1N1:0.0027993900,A/mallard/Marquenterre/Z237/1983_H1N1:0.0002006110):0.0006782510):0.0004593260,((A/mallard/Maryland/02-184/2002_H1N1:0.0028603100,A/mallard/Maryland/170/2002_H1N1:0.0011396900):0.0013681000,A/pintail/Alberta/21/2006_H1N1:0.0026319000):0.0004117440):0.0016122900):0.0022204600,A/swine/Eire/89/1996_H1N1:0.0165262000):0.0011924900,A/duck/Victoria/23/1981_H1N1:0.0217710000):0.0048526600):0.0059114400):0.0086892100,A/Brevig_Mission/1/1918_H1N1:0.0000086979);
